# Supplementary material
Source: Royal Society of Chemistry journal article supplement (doi:10.1039/d6ta02045c)
Supplement: d6ta02045c1.pdf [file d6ta02045c1.pdf]

## Supporting Information

# Synergistic Modification of BN and TiO<sub>2</sub> on Polyethersulfone Multilayered Dielectric for Enhanced Elevated-Temperature Energy Storage Performance

Yue Zhang<sup>\*a,b,c</sup>, Wenhao Zhang<sup>c</sup>, Guowei Hao<sup>c</sup>, Jiaying Che<sup>c</sup>, Zewei Wang<sup>c</sup>, Yinhua Zhou<sup>d</sup>,  
Changhai Zhang<sup>a,b,c</sup>, Yongquan Zhang<sup>a,b,c</sup> and Tiandong Zhang<sup>a,b,c</sup>

<sup>a</sup>State Key Laboratory of High-Efficiency Special Cable Technology, Harbin University of Science and Technology, Harbin, 150080, P. R. China

<sup>b</sup>Key Laboratory of Engineering Dielectrics and Its Application, Ministry of Education, Harbin University of Science and Technology, Harbin, 150080, P. R. China

<sup>c</sup>School of Electrical and Electronic Engineering, Harbin University of Science and Technology, Harbin, 150080, P. R. China

<sup>d</sup>State Grid Sichuan Electric Power Company Guang'an Power Supply Company, Guang'an. 638000, P. R. China

\* Corresponding Author:

E-mail: yzhang\_ana@hrbust.edu.cn.

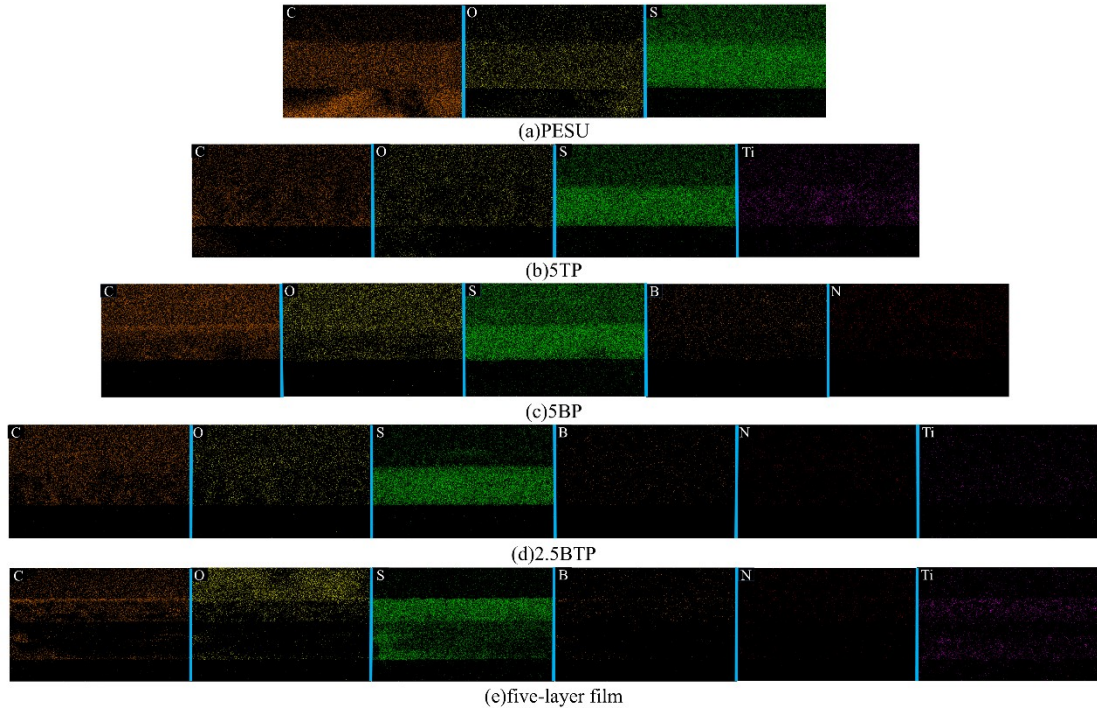

**Figure S1.** EDS spectra of PESU-based composite films.

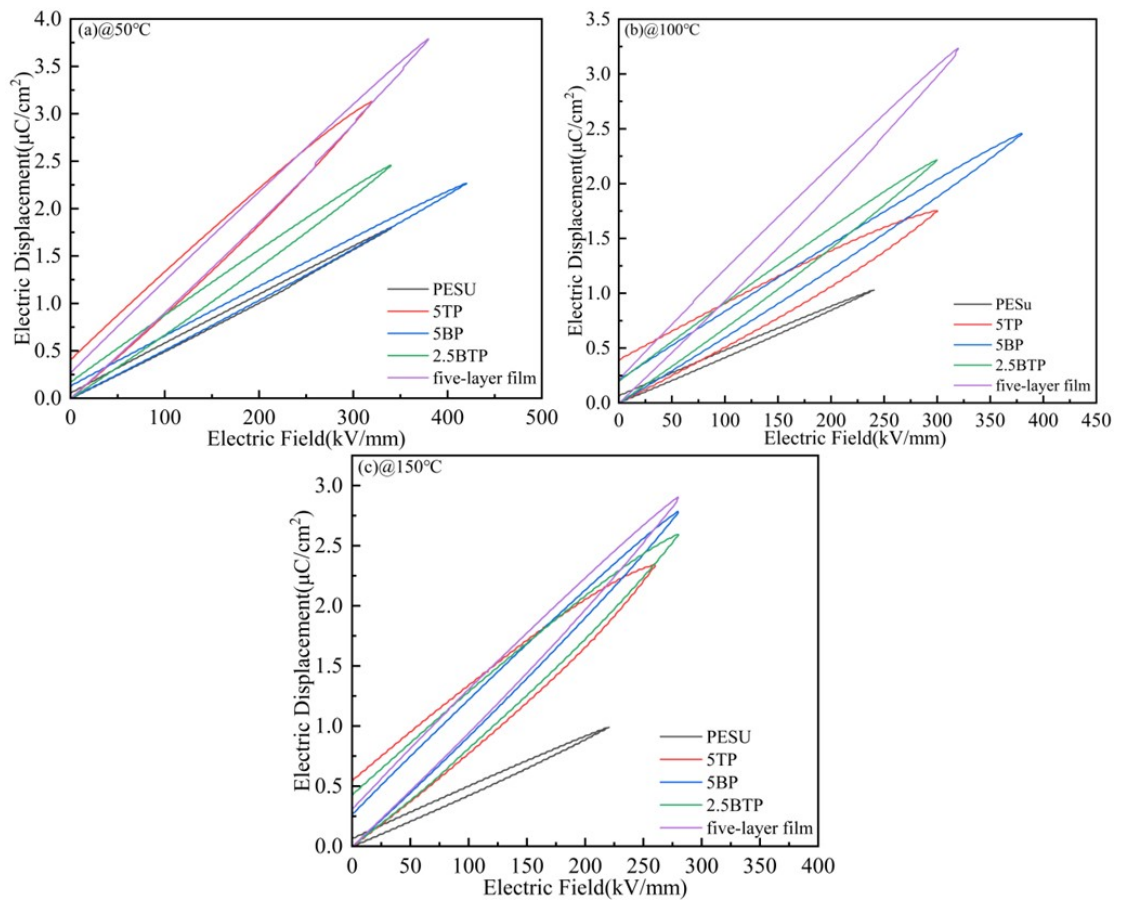

**Figure S2.** The relationship curve of  $D-E$  loops (electric displacement vs. electric field strength) for composites.
